# Supplementary material for: Novel class of functionalized ionic liquids with grafted CMPO-moieties for actinides and rare-earth elements recovery
Source: Royal Society of Chemistry journal article supplement (doi:10.1039/b926377b), 2010-01-01
Supplement: b926377b.pdf [file b926377b.pdf]

## Supplementary data for

### NOVEL CLASS OF FUNCIONALIZED IONIC LIQUIDS WITH GRAFTED CMPO-MOIETIES FOR ACTINIDES AND RARE-EARTH ELEMENTS RECOVERY.

I.L. Odinets, E.V. Sharova, O.I.Artyshin, K.A. Lyssenko, Yu.V. Nelyubina,  
G.V.Myasoedova, N.P.Molochnikova, E.A.Zakharchenro

#### 1.1. Experimental details

**2-(Diphenylphosphinyl)-N-[3-(1*H*-imidazol-1-yl)propyl]-acetamide (3).** A mixture of ethyl(diphenylphosphoryl)acetate (4.6 g, 0.016 mol) and 3-(1*H*-imidazol-1-yl)-1-propanamine (2.8 g, 0.023 mol) in 5 mL of anhydrous EtOH was heated in a sealed tube in a boiling water bath for 72 h. The tube was opened, the solvent was removed *in vacuo*, and the residue was recrystallized from EtOAc-EtOH (10:1) to give **3** as a white solid; yield: 4.7 g (81%); mp 145-146 °C (EtOAc-EtOH). IR (cm<sup>-1</sup>): 1438 (ν<sub>CH<sub>2</sub></sub>), 1180 (ν<sub>P=O</sub>), 1661 (ν<sub>C=O</sub>), 3263, 1546 (ν<sub>NH</sub>). <sup>1</sup>H NMR (400 MHz, CDCl<sub>3</sub>, ppm, J/Hz): 1.83 (q, 2H, CH<sub>2</sub>CH<sub>2</sub>NHC(O), <sup>3</sup>J<sub>H-H</sub>=6.6); 3.20 (appeared qv, 2H, CH<sub>2</sub>NHC(O), <sup>3</sup>J<sub>H-H</sub>=6.4); 3.31 (d, 2H, PCH<sub>2</sub>, <sup>2</sup>J<sub>P-H</sub>=12.4); 3.69 (t, 2H, CH<sub>2</sub>CH<sub>2</sub>CH<sub>2</sub>NHC(O), <sup>3</sup>J<sub>H-H</sub>=7.1); 6.79 (br. s, 1H, C<sup>5</sup>H in Im); 7.00 (br. s, 1H, C<sup>4</sup>H in Im); 7.46 (br. s, 1H, NH); 7.47-7.53 (m, 4H, *m*-C<sub>6</sub>H<sub>5</sub>P); 7.54-7.60 (m, 2H, *p*-C<sub>6</sub>H<sub>5</sub>P); 7.70-7.78 (m, 4H, *o*-C<sub>6</sub>H<sub>5</sub>P); 7.32 (br. s, 1H, N=CH-N). <sup>31</sup>P NMR (162 MHz, CDCl<sub>3</sub>, ppm): 30.41 ppm. <sup>13</sup>C NMR (75.47 MHz, CDCl<sub>3</sub>): δ 30.32 (CH<sub>2</sub>CH<sub>2</sub>N), 35.98 (NHCH<sub>2</sub>), 38.41 (d, PCH<sub>2</sub>, <sup>1</sup>J<sub>PC</sub>=60.9 Hz), 43.47 (N<sub>Im</sub>-CH<sub>2</sub>), 118.46 (C<sup>4</sup> (Im)), 128.38 (d, *m*-C in C<sub>6</sub>H<sub>5</sub>, <sup>3</sup>J<sub>PC</sub>= 12.1 Hz), 128.72 (C<sup>5</sup> (Im)), 130.29 (d, *o*-C in C<sub>6</sub>H<sub>5</sub>, <sup>2</sup>J<sub>PC</sub>=9.9 Hz), 131.16 (d, ipso-C in C<sub>6</sub>H<sub>5</sub>, <sup>1</sup>J<sub>PC</sub>=103.2 Hz), 131.97 (*p*-C in C<sub>6</sub>H<sub>5</sub>), 136.71 (C<sup>2</sup> (Im)), 164.59 (d, C(O), <sup>2</sup>J<sub>PC</sub>=4.9 Hz). Anal. Calcd for C<sub>20</sub>H<sub>22</sub>N<sub>3</sub>O<sub>2</sub>P: C, 65.39; H, 6.04; N, 11.44; P, 8.43. Found: C, 65.24; H, 5.86; N, 11.39; P, 8.13.

**Table S1.** Selected bond lengths and angles in crystals of **4d** and **6c**.

| Lengths, Å | <b>4d</b>  | <b>6c</b>  | Angles, °     | <b>4d</b>  | <b>6c</b>  |
|------------|------------|------------|---------------|------------|------------|
| P(1)-O(1)  | 1.4907(17) | 1.4944(14) | O(1)P(1)C(10) | 112.34(11) | 116.22(9)  |
| N(1)-C(2)  | 1.326(3)   | 1.322(2)   | N(1)C(2)N(3)  | 108.3(2)   | 109.19(18) |
| C(2)-N(3)  | 1.332(3)   | 1.325(2)   | C(2)N(3)C(4)  | 108.9(2)   | 108.19(17) |
| N(3)-C(4)  | 1.371(3)   | 1.376(2)   | N(3)C(4)C(5)  | 107.1(2)   | 106.99(18) |
| C(4)-C(5)  | 1.351(3)   | 1.349(3)   | C(4)C(5)N(1)  | 106.9(2)   | 107.23(17) |
| C(5)-N(1)  | 1.378(3)   | 1.371(2)   | C(5)N(1)C(2)  | 108.85(19) | 108.40(17) |
| N(1)-C(6)  | 1.469(3)   | 1.473(2)   | C(2)N(1)C(6)  | 125.5(2)   | 124.16(17) |
| C(6)-C(7)  | 1.521(4)   | 1.530(3)   | N(1)C(6)C(7)  | 110.6(2)   | 110.96(16) |
| C(7)-C(8)  | 1.518(3)   | 1.522(3)   | C(6)C(7)C(8)  | 114.0(2)   | 114.72(16) |
| N(4)-C(8)  | 1.453(3)   | 1.450(2)   | C(7)C(8)N(4)  | 110.5(2)   | 112.04(16) |
| N(4)-C(9)  | 1.336(3)   | 1.346(2)   | C(8)N(4)C(9)  | 123.5(2)   | 123.76(16) |
| C(9)-O(2)  | 1.230(3)   | 1.238(2)   | O(2)C(9)N(4)  | 123.8(2)   | 123.65(18) |

**Table S2.** Crystal data and structure refinement parameters for **4d** and **6c**.

| Compound                                                          | <b>4d</b>                                                                                                    | <b>6c</b>                                                                                   |
|-------------------------------------------------------------------|--------------------------------------------------------------------------------------------------------------|---------------------------------------------------------------------------------------------|
| Empirical formula                                                 | C <sub>60</sub> H <sub>86</sub> Br <sub>2</sub> Cl <sub>6</sub> N <sub>6</sub> O <sub>5</sub> P <sub>2</sub> | C <sub>26</sub> H <sub>35</sub> F <sub>6</sub> N <sub>3</sub> O <sub>2</sub> P <sub>2</sub> |
| Formula weight                                                    | 1405.81                                                                                                      | 597.51                                                                                      |
| Crystal colour, habit                                             | colorless, prism                                                                                             | colorless, needle                                                                           |
| Crystal size (mm)                                                 | 0.18 × 0.20 × 0.25                                                                                           | 0.08 × 0.10 × 0.45                                                                          |
| Crystal system                                                    | Orthorhombic                                                                                                 | Triclinic                                                                                   |
| Space group                                                       | Pbca                                                                                                         | P-1                                                                                         |
| <i>a</i> (Å)                                                      | 23.9357(16)                                                                                                  | 5.9341(9)                                                                                   |
| <i>b</i> (Å)                                                      | 11.7625(8)                                                                                                   | 15.819(3)                                                                                   |
| <i>c</i> (Å)                                                      | 25.1174(17)                                                                                                  | 16.393(3)                                                                                   |
| $\alpha$ (°)                                                      | –                                                                                                            | 65.857(3)                                                                                   |
| $\beta$ (°)                                                       | –                                                                                                            | 88.250(4)                                                                                   |
| $\gamma$ (°)                                                      | –                                                                                                            | 80.353(4)                                                                                   |
| <i>V</i> (Å <sup>3</sup> )                                        | 7071.6(8)                                                                                                    | 1383.1(4)                                                                                   |
| <i>Z</i> ( <i>Z</i> )                                             | 4(0.5)                                                                                                       | 2(1)                                                                                        |
| <i>F</i> (000)                                                    | 2920                                                                                                         | 624                                                                                         |
| <i>D</i> <sub>calc</sub> (g cm <sup>-3</sup> )                    | 1.320                                                                                                        | 1.435                                                                                       |
| Linear absorption, $\mu$ (cm <sup>-1</sup> )                      | 14.66                                                                                                        | 2.28                                                                                        |
| 2 $\theta$ <sub>max</sub> (°)                                     | 58                                                                                                           | 54                                                                                          |
| Completeness of dataset (%)                                       | 99.9                                                                                                         | 98.0                                                                                        |
| Reflections measured                                              | 82400                                                                                                        | 8923                                                                                        |
| Independent reflections                                           | 9385 [R <sub>int</sub> = 0.0622]                                                                             | 5935 [R <sub>int</sub> = 0.0284]                                                            |
| Observed reflections [ <i>I</i> > 2 $\sigma$ ( <i>I</i> )]        | 6976                                                                                                         | 3936                                                                                        |
| Parameters                                                        | 378                                                                                                          | 356                                                                                         |
| Final <i>R</i> ( <i>F</i> <sub>hkl</sub> ): <i>R</i> <sub>1</sub> | 0.0385                                                                                                       | 0.0403                                                                                      |
| <i>wR</i> <sub>2</sub>                                            | 0.1233                                                                                                       | 0.0677                                                                                      |
| GOF                                                               | 1.007                                                                                                        | 1.004                                                                                       |
| $\Delta\rho_{\max}$ , $\Delta\rho_{\min}$ (e Å <sup>-3</sup> )    | 0.808, -0.602                                                                                                | 0.365, -0.391                                                                               |

## Spectroscopy of compounds

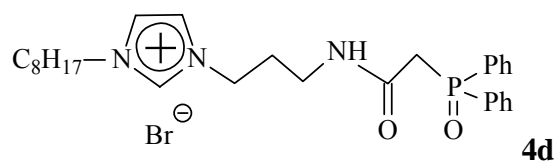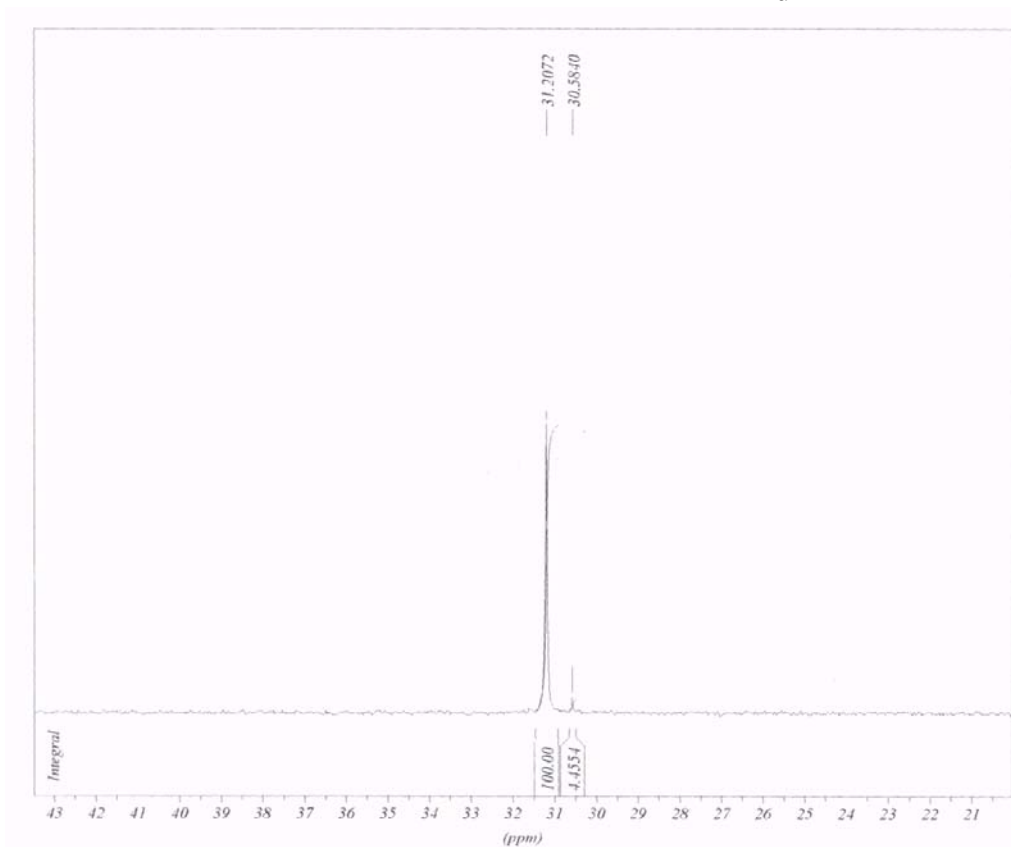

Fig S1. The <sup>31</sup>P spectrum for ligand **4d**

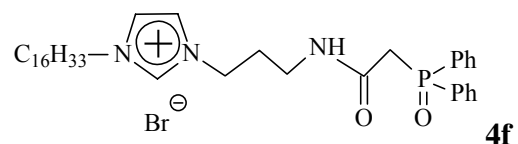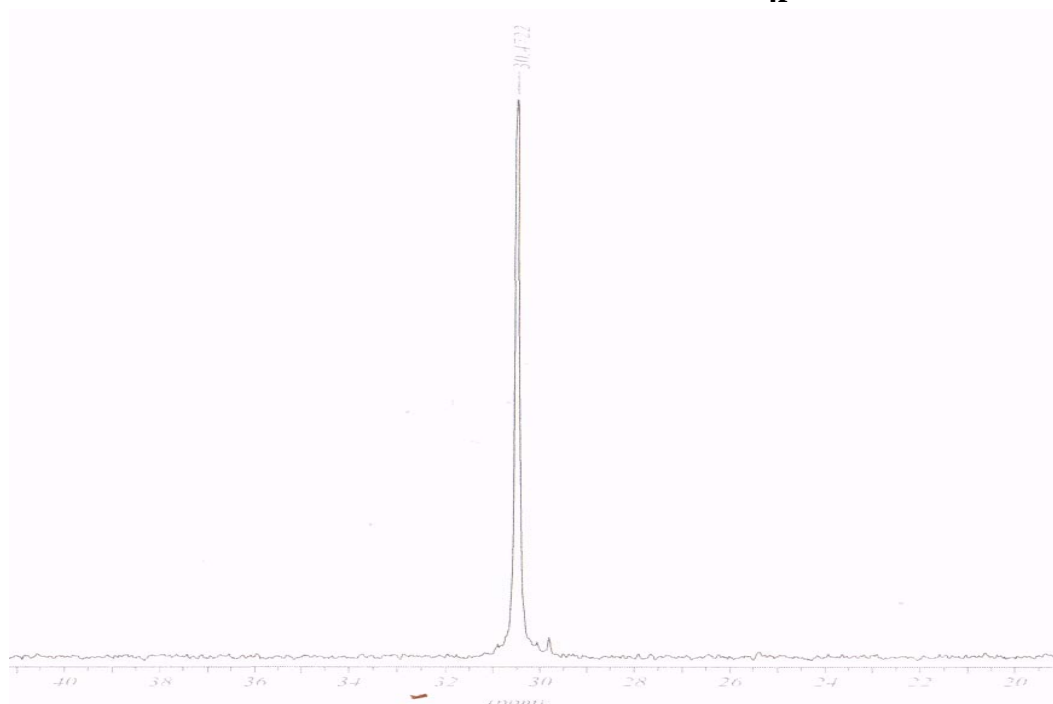

Fig S2. The  $^{31}\text{P}$  spectrum for ligand **4f**

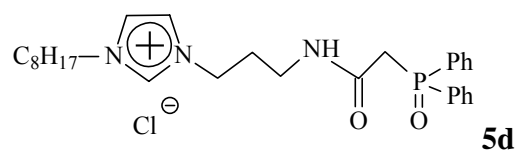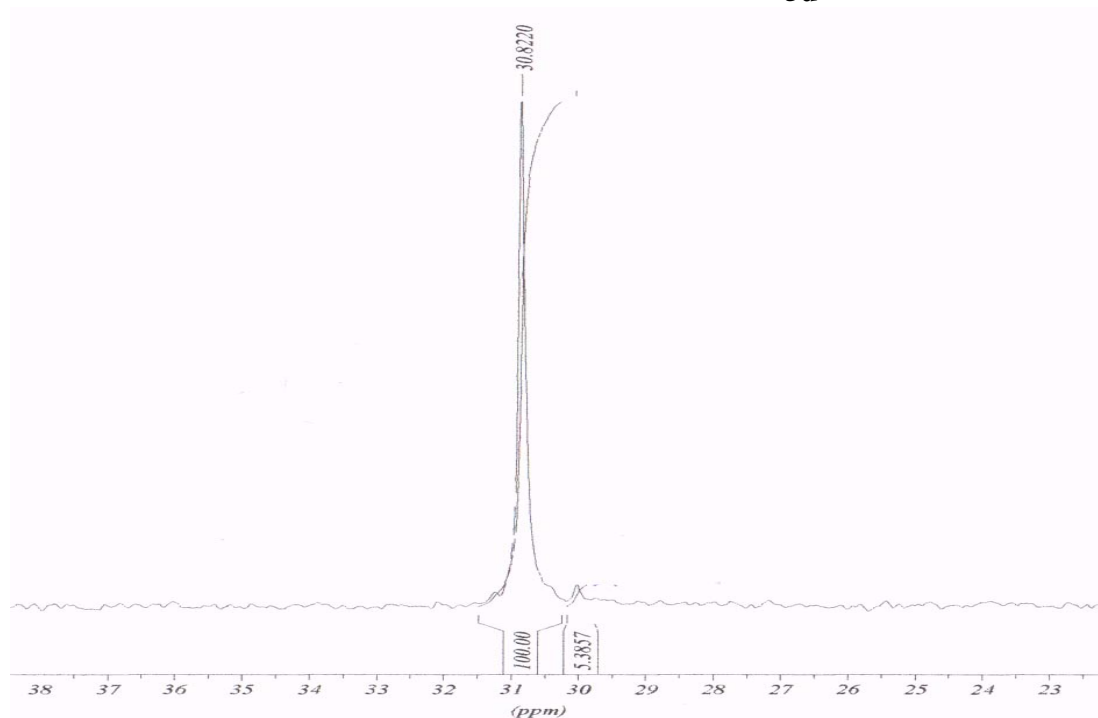

Fig S3. The  $^{31}\text{P}$  spectrum for ligand **5d**

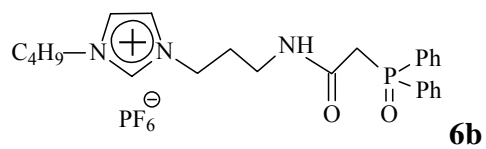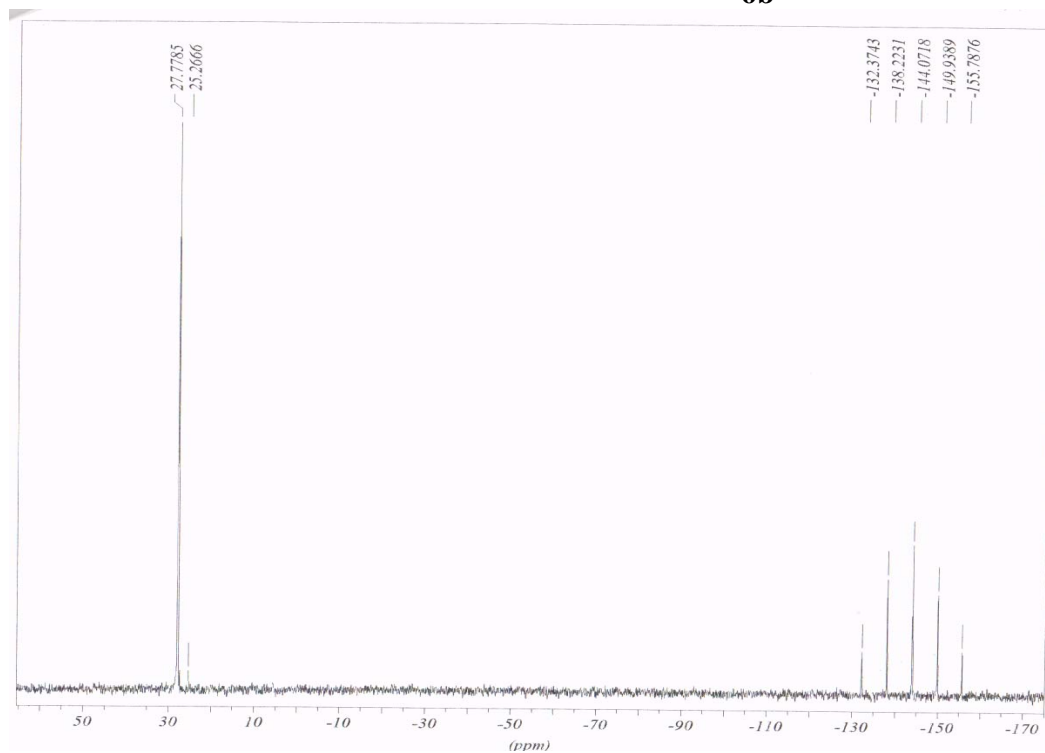

Fig S4. The  $^{31}P$  spectrum for ligand **6b**

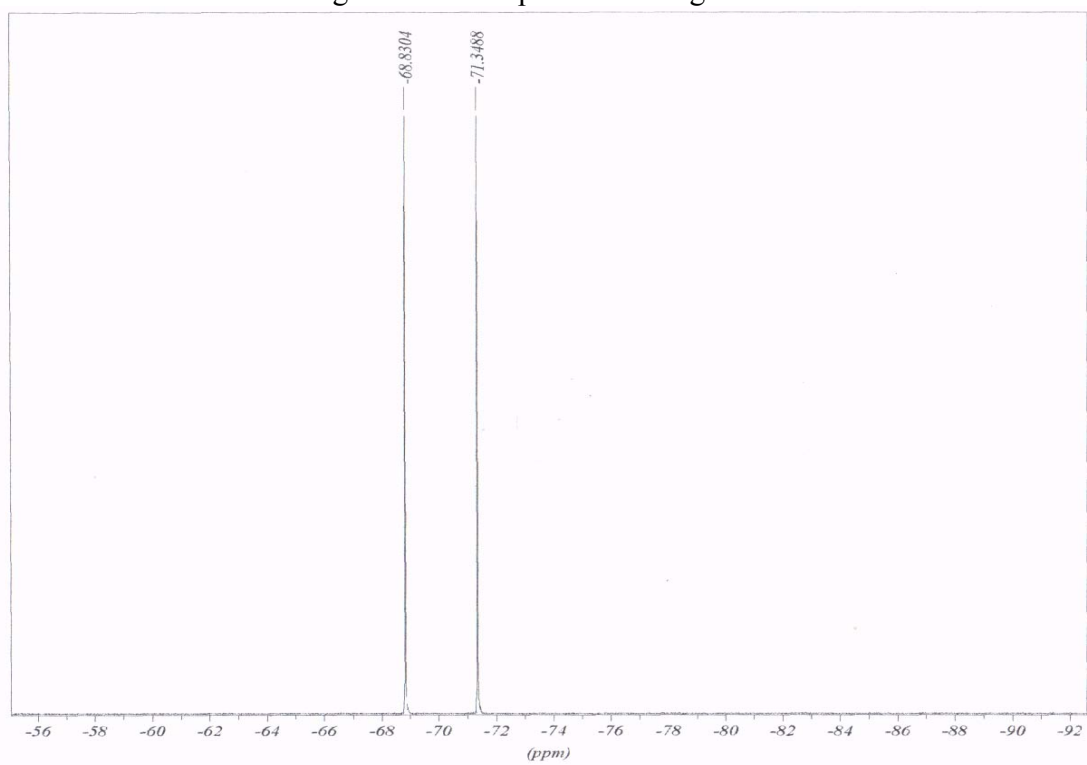

Fig S5. The  $^{19}F$  spectrum for ligand **6b**

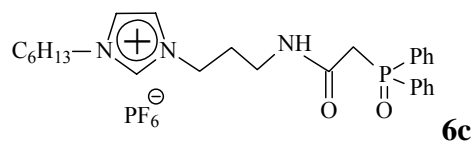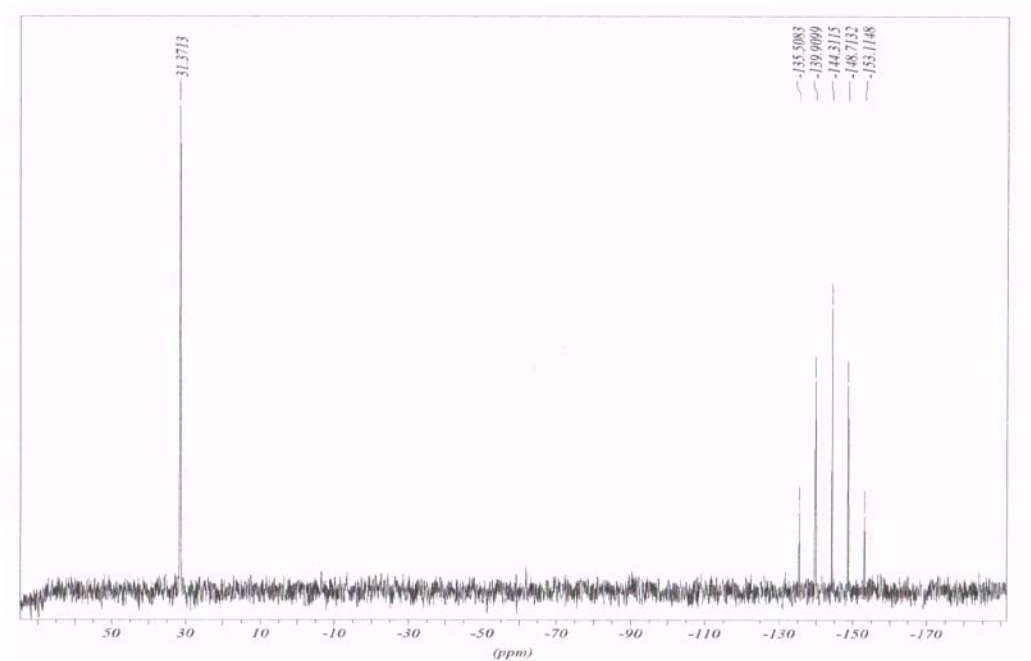

Fig S6. The <sup>31</sup>P spectrum for ligand **6c**

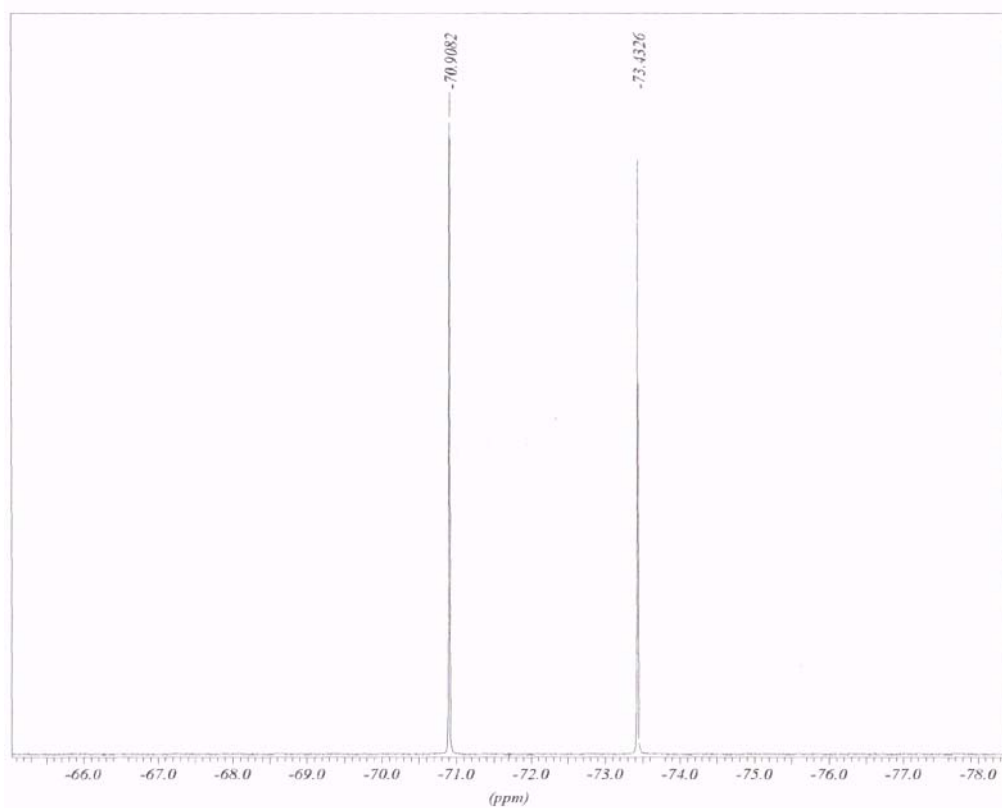

Fig S7. The <sup>19</sup>F spectrum for ligand **6c**

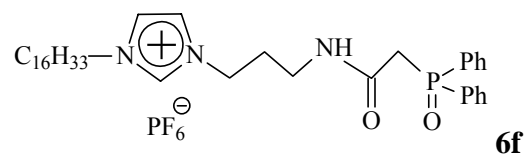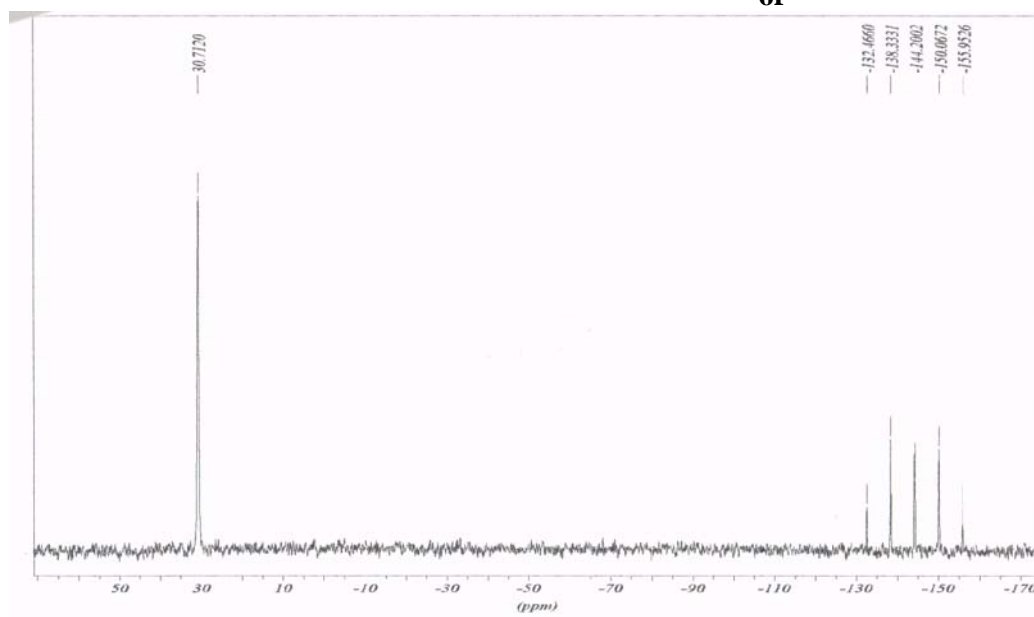

Fig S8. The  $^{31}\text{P}$  spectrum for ligand **6f**

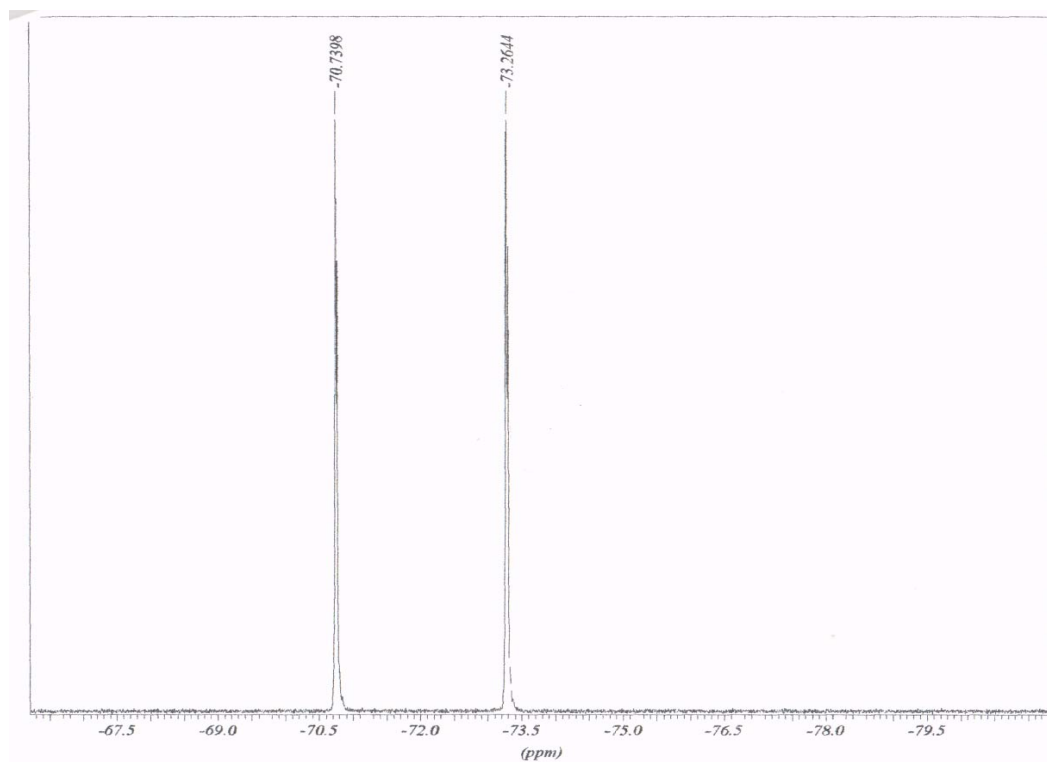

Fig S9. The  $^{19}\text{F}$  spectrum for ligand **6f**



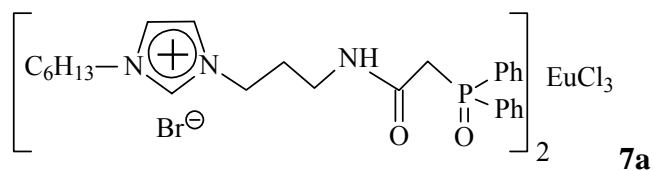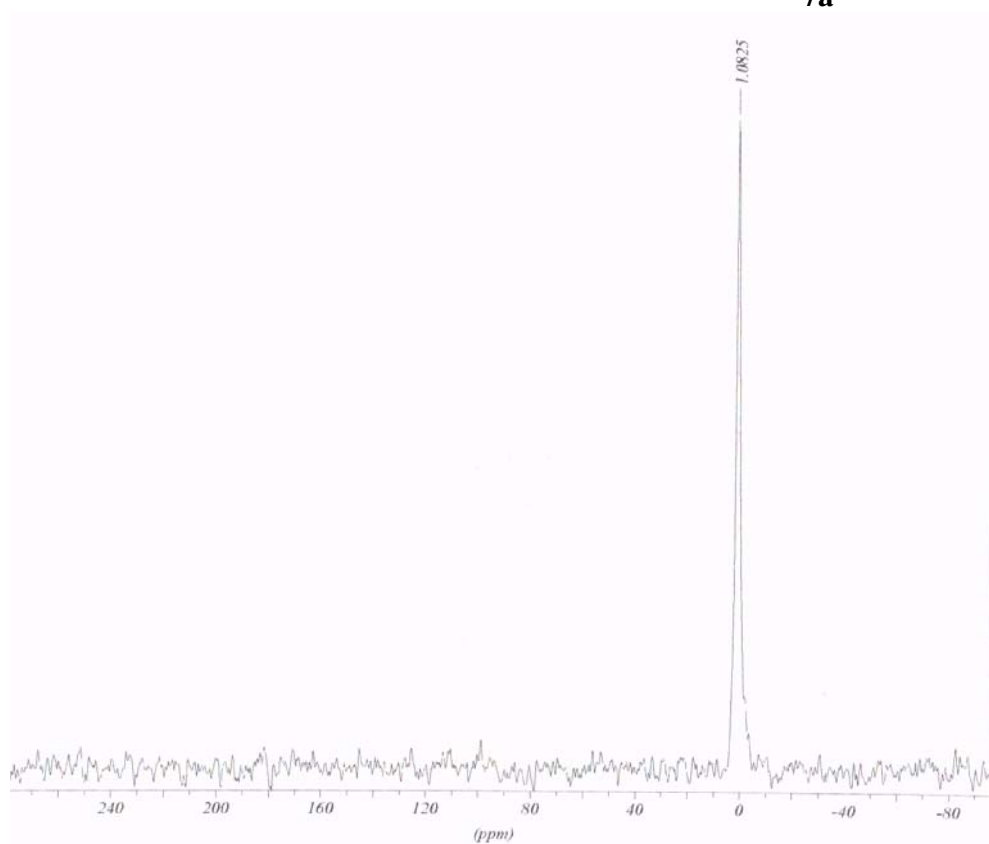

Fig S10. The <sup>19</sup>F spectrum for complex **7a**
